# Supplementary material
Source: PubMed Central journal article supplement (PMC6048555)
Supplement: pnas.1801930115.sapp.pdf [file pnas.1801930115.sapp.pdf]

## Supporting Information

### Konrad et al. “*Mutational and Transcriptional Landscape of Spontaneous Gene Duplications and Deletions in Caenorhabditis elegans.*”

#### SI Experimental Procedures

**Study System.** *Caenorhabditis elegans* is a self-fertilizing nematode where the majority of individuals are hermaphrodites. The species has a short generation time of 3.5 days from egg to egg-laying adult at 20°C in the laboratory. The species is particularly amenable to MA studies as selfing rapidly drives populations to homozygosity (1–3). Another immense advantage of this system is the ability of nematode cultures to survive long-term cryogenic storage at –86°C, enabling direct comparisons between experimentally evolved lines and ancestral genotypes (4).

**Spontaneous MA experiment in *C. elegans* at Varying Population Sizes.** The size of these bottlenecks was ensured through careful counting of randomly chosen L4 larvae selected to establish a new generation every four days. All populations were grown on NGM plates (Nematode Growth Medium) at 20°C. Twenty MA lines were propagated through single individual descent, while ten lines were bottlenecked to ten individuals, and five lines were bottlenecked to 100 individuals every generation (*Fig. S1A*). The lines were propagated through 409 generations or until extinction under standard laboratory conditions. Populations of size  $N = 1$  and 10 were maintained on 60×15 mm petri dishes seeded with 250µl of *Escherichia coli* (OP50) in YT medium.  $N = 100$  populations were housed on 90 ×15 mm petri dishes seeded with 750µl OP50 in YT medium.

**Theoretical Underpinnings of the MA experiment.** The fitness effect of a mutation can range continuously from the lethal to deleterious to neutral to beneficial. In small populations, beneficial mutations can be lost and detrimental mutations fixed by chance, or genetic drift. As the population size increases, the importance of genetic drift for the loss or fixation of mutations is diminished. The magnitude of the fitness effect of an individual mutation,  $s$ , also has bearing on the influence of drift on the fate of mutations. In small populations, mutations with a small reduction in fitness can reach fixation by genetic drift whereas mutations with a large reduction in fitness are more likely to get lost due to natural selection. Thus, the loss or fixation of mutations depend upon both their selection coefficients ( $s$ ) and the effective population size,  $N_e$ . It has been shown that for sexually reproducing diploids, the dynamics of mutations with  $|s| \ll 1/2N_e$  are dominated by random genetic drift (5, 6). Conversely, the dynamics of mutations with  $|s| \gg 1/2N_e$  are governed by natural selection. Furthermore, given the obligate self-fertilization mode of reproduction in hermaphroditic species such as *C. elegans*, complete inbreeding results in a 50% reduction in  $N_e$  relative to the census population size  $N$  (or  $N_C$ ) (7, 8). Hence, from the perspective of population-genetic theory, the genetic effective population sizes of our three treatments of  $N = 1, 10$  and  $100$  hermaphrodites actually correspond to  $N_e = 1, 5$  and  $50$  individuals, respectively (*Fig. S1B*). For lines bottlenecked each generation at  $N = 1, 10$  and  $100$  individuals, the fate of mutations with selection coefficients less than  $0.5, 0.1,$  and  $0.01$  is expected to be dominated by genetic drift and they will accumulate at the neutral rate although they may not be neutral with respect to absolute fitness (9, 10). Therefore, small populations subjected to attenuated selection and an increased magnitude of genetic drift can potentially accumulate mutations with extremely large effects in addition to ones with moderate to very slight effects. The demarcation between the behavior of mutations with  $2N_e s < 1$ , which should

be dominated by genetic drift and  $2N_e s > 1$ , which are under greater influence of natural selection, is not sharply defined and some mutations with a larger fitness cost than  $1/2N_e$  could be fixed by genetic drift. Nonetheless, the differences in populations size in these MA experiments alters the relative importance of genetic drift versus natural selection in the fixation or loss of mutations, with genetic drift having the greatest influence in  $N = 1$  lines and diminishing in strength with increasing population size.

**gDNA Extraction and Whole-Genome Sequencing.** One individual of the pre-MA ancestral line was selected to serve as the control. The 86 individual worms were allowed to go through several cycles of self-fertilization to generate enough offspring necessary for extracting sufficient gDNA. Sequencing preparation followed the methodologies previously described (11–13). The PureGene Genomic DNA Tissue Kit (QIAGEN no. 158622) was used for genomic DNA isolation with a supplemental nematode protocol. gDNA quality was checked on 1% agarose gels via electrophoresis and the concentration was determined by a BR Qubit assay (Invitrogen) and a Nanodrop spectrophotometer (Thermo Fisher). Sonication of  $2\mu\text{g}$  of each DNA sample in  $85\mu\text{l}$  TE buffer yielded a target DNA fragment length of 200-400 bp, which were subsequently end-repaired by the NEBNext end repair module (New England BioLabs) and purified using Agencourt AMPure XP beads (Beckman Coulter Genomics). 3' adenine overhangs were added (AmpliTaq DNA Polymerase Kit, Life Technologies), and custom pre-annealed Illumina adapters were ligated to the fragments. PCR amplification was performed via Kapa Hifi DNA Polymerase (Kapa Biosystems) using Illumina's paired-end genomic DNA primers with 8 bp barcodes. Size-fractionation of the PCR products was done on 6% PAGE gels and 300-400 bp fractions were selected for excision. Gel extraction of the fragments was performed via diffusion

at 65°C and gel filtration (NanoSep, Pall Life Sciences), followed by a final purification step with Agencourt AMPure beads. The Agilent HS Bioanalyzer and HS Qbit assays were used to assess DNA quality and quantity. The multiplexed DNA libraries were sequenced on Illumina HiSeq sequencers at the Northwest Genomics Center (University of Washington), using default quality filters for the sequence reads. The sequence reads from the 86 genomes were demultiplexed and stored as raw sequence reads in individual FASTQ files for further analysis.

**oaCGH-based Copy-number Variant Detection.** Custom designed microarrays (071114\_CE2\_WG\_CGH\_T and 120618\_Cele\_WS230\_JK\_CGH) were manufactured by Roche NimbleGen Inc. Every subarray of the custom 3-plex microarrays consists of 720,000 50-mer oligonucleotide probes. The selection of probes followed Maydan et al. (14) and included both coding and non-coding DNA as well as preexisting duplications (15, 16). For  $N = 1$  lines, single individuals were expanded to generated worms for gDNA extraction. Because larger populations are expected to possess greater genetic variation, we surveyed the genomes of two and four individuals from each of the  $N = 10$  and  $N = 100$  MA lines, respectively. Segmentation analysis followed the techniques of Maydan et al. (14). A bottom-up algorithm was applied for the segmentation, in which case adjacent segments were merged until the neighboring segments failed to reach a preset similarity ( $t$ -test calculated) threshold. Following the segmentation, the putative segments were further filtered based on their average  $\log_2$ ratios and  $p$ -values ( $t$ -test), and sorted into duplications and deletions, as previously described (14). An initial estimation of minimum length and the breakpoint locations of deletion and duplication events identified above was based on the sequence length contained between the first and last probe within the given

CNV event. The exact breakpoint locations were based on DNA sequence alignment data as described below.

**Identification of Copy-Number and Structural Variants from WGS Data.** The raw reads in FASTQ format were aligned to the reference N2 genome (version WS247; [www.wormbase.org](http://www.wormbase.org)) (17) via the Burrows-Wheeler Aligner (BWA Version 0.5.9) (18) with default settings. Additional alignments were generated using Phaster using default settings, but allowing for insertions and deletions of 300 bp. Potential PCR and optical duplicates were removed using the sort and rmdup utilities in the SAMtools package (Version 0.1.18) (19). Additionally, the Phaster and BWA alignments were analyzed separately. Due to potential contamination in two lines of size  $N = 1$ , only 18  $N = 1$  lines were included in the final analysis (1A-1H, 1J-1K, and 1M-1T). Five copy-number variation (CNV) and structural variation (SV) detection tools were employed, including paired-end and split read analyses using DELLY (20), Pindel (21), and RAPTR-SV (22) and the read depth approach CNVnator (23) and CNV-seq (24). While all five programs were used to detect putative CNVs/SVs in the BWA and Phaster alignments independently, calls made by Delly, Pindel, and RAPTR-SV based on Phaster alignments were given more weight for breakpoint determination due to improved split read delineation.

CNVnator was run with two different bin sizes. Bins of 50 bp allowed for the detection and verification of small duplication and deletion events, while bins of size 1,000 bp helped in the verification and detection of larger-scale events. DELLY, Pindel and RAPTR-SV were run using mainly default parameters, although the minimum CNV size for Pindel was set to 50 bp in order to attain a manageable list of putative CNVs. Low-quality calls were removed from the list

of putative calls, while high quality calls were initially retained, even if the breakpoints listed were not exact. Any calls pre-existing in the ancestral strain were also removed from the list of putative variants, save for those which were ancestral multi-copy regions which either gained an extra copy, or lost one throughout the MA phase. CNV-seq was run with a window size of 500 bp, a minimum extent of four windows of 250 bp overlap, a  $\log_2$ -ratio threshold of 0.6, and a  $p$ -value threshold of  $10^{-5}$ .

The initial list of putative CNVs was comprised of all putative CNVs identified via oaCGH. These events were verified and filtered by comparison to calls made by CNVnator, CNV-seq, DELLY, Pindel, and RAPTR-SV, as well as manual visualization of the putative variant in the Integrated Genome Viewer (IGV) (25). A second list of putative CNV events (not detected via oaCGH) was comprised of all high-quality additional CNV calls made by any of the four sequence-based analysis programs (CNVnator, Pindel, DELLY, and RAPTR-SV). These variant calls were considered for further analysis only if at least two of the programs above supported the call, and if CNV-seq indicated that a copy-number increase or decrease with respect to the ancestor had, in fact, taken place.

Breakpoints for all copy-number changes were first determined using DELLY, Pindel, and RAPTR-SV to identify multiple split reads verifying the same breakpoints. If such high-quality breakpoints were not available because the breakpoints fell into repetitive regions thereby rendering split reads unavailable or unreliable, putative CNV boundaries were examined with respect to the mapping of the read segment that was split off, and the orientation and location of the read mates. MUSCLE (26) was used to generate alignments of the regions flanking the

duplication or deletion of interest and visual refinement of the alignments was sometimes necessary to identify the precise location of the breakpoints. If neither of the above applied, read depth cut-offs were identified visually in IGV, using calls made by CNV-seq, CNVnator, and the oaCGH as guides. In order to finalize the data set of duplications and deletions, SVELTER (27) was used as a final tool in order to determine if any duplications were likely candidates for inverted duplications or more complex events.

**RNA Library Preparation, Sequencing, and Analysis of Transcript Abundance.** One individual was isolated from every population of size  $N = 1$  and the ancestral control, while two and three individuals were isolated from populations of size  $N = 10$  and  $N = 100$ , respectively. The isolated individuals were sequestered on to NGM plates containing OP50 lawns and kept at 20°C. For each of these 54 individuals, three offspring at the L4 larval stage were isolated from the F<sub>1</sub> generation to serve as biological replicates in the expressional analysis (*Fig. S5*), yielding a total of 162 samples for tissue collection and RNA sequencing at the L1 larval stage. The isolated individuals were sequestered on to NGM plates containing OP50 lawns and maintained at 20°C. All 162 sample populations were kept for another three generations to yield enough tissue for RNA extraction. Synchronized populations of L1 larvae were generated through the collection of gravid eggs from adults using a standard bleaching protocol. Hatched L1 larvae were collected for RNA extraction and total RNA was isolated via the Qiagen RNeasy Mini Kit. The RNA quality of the samples was evaluated using the Nanodrop 2000, Qubit 3.0 Fluorometer, and an Agilent RNA Analyzer. RNA sequencing libraries for each sample were prepared with the Illumina TruSeq RNA library Prep Kit v2 using standard procedures at the Texas A&M University Genomics and Bioinformatics Services Center. The RNA was fragmented and

Illumina adapters were annealed for amplification. A Qiagen Gel Extraction Kit was used to isolate size selected cDNA fragments. Sequencing was performed using an Illumina HiSeq 4000 platform using default quality filters for the sequencing reads. Sequencing reads were demultiplexed and prefiltered based on default Illumina QC protocols, reads with abnormally short insert lengths were filtered out, and adapters were removed from the reads. The final raw reads were stored in FASTQ files.

TopHat (28, 29) was used to align sequencing reads to the protein-coding transcriptome of *C. elegans* (Wormbase reference N2 genome version WS247). The “very sensitive” bowtie2 algorithm within TopHat was used for alignment with a maximum of one mismatch in the anchor region for each spliced alignment and a minimum and maximum intron length of 20 and 3,000 bp, respectively. Relative transcript abundance for each protein-coding gene was estimated via Cufflinks (29, 30) and gene annotations from the N2 genome version WS247 using default settings. All following analyses were focused on FPKM values calculated on the per gene level. For each individual isolated from one of the original 33 MA populations or the ancestral line, the relative transcript abundance (FPKM) from the three replicates were averaged to get a mean relative transcript abundance for each gene.

**Annotation and Characterization of Duplications and Deletions.** Gene duplicates and deletions were annotated based on the GFF file available for the N2 reference genome of *C. elegans* (version WS247; [www.wormbase.org](http://www.wormbase.org)) (17) using a custom script. Genes were annotated based on their assigned gene types: protein-coding, rRNA, tRNA, pseudogene, and other non-protein coding genes. Initially, protein-coding genes that were duplicated or deleted in their



entirety were designated as *complete* gene duplicates or deletions, while those which were only partially duplicated or deleted were classified as *partial*. In cases where a duplication was immediately followed by a partial loss of copies within the same MA line (which was evident from split read and read pair analysis), only the genes remaining in multiple copies at the end of the MA experiment were considered for inclusion into mutation rates.

Mutation rates ( $\mu$ ) were estimated as duplications or deletions per genome per generation ( $M_{CNV_i} = \frac{E_{CNV}}{g}$ ), and as duplications or deletions per protein-coding gene per generation ( $\mu_{CNV_i} = \frac{G_{CNV}}{G_{total} * g}$ ) for each individual line,  $i$ , sequenced, where  $E_{CNV}$  refers to the number of duplications, deletions, or complex events within the line,  $g$  refers to the number of generations through which a specific line was propagated,  $G_{CNV}$  refers to the number of genes affected by a duplication or deletion within the line, and  $G_{total}$  refers to the total number of protein-coding genes in the genome (20,724 protein-coding genes in the N2 reference genome: version WS247). For populations of size  $N > 1$ , an average mutation rate was attained by averaging across all individuals sequenced for a given MA line (four and five individuals for MA lines of size  $N = 10$  and 100, respectively). Further, to attain average mutation rates across all replicate MA lines within a given population size treatment, the line-specific mutation rates were averaged within each population size treatment:  $\mu_{CNV} = \frac{\sum_{i=1}^N \mu_{CNV_i}}{N}$ , where  $CNV_i$  refers to the line-specific mutation rate, and  $N$  refers to the total number of replicates within a given population size treatment (18, 10, and 5 lines for populations of size  $N = 1, 10, \text{ and } 100$ , respectively). The number of generations through which each MA line was propagated differed between the  $N = 1$  lines ([Table S7](#)), as some MA lines required frequent backups due to significant fitness decline or

went extinct. Mutations rates were estimated separately for duplications and deletions in previously unduplicated genomic regions (referred to as unique duplications or unique deletions), and for those in pre-existing duplicated regions (referred to CNV gains or CNV losses). Differences in the distribution of mutation rates and length distributions were assessed via correlation tests (Kendall's correlation on log mutation rates and Pearson's correlation on log lengths) in R (31). Permutation tests were performed by resampling the mutation rates and lengths into the population sizes without replacement and recalculating the corresponding correlation coefficients for each analysis every iteration. 100,000 iterations were performed for each permutation test to identify the 95% confidence intervals for the correlation coefficients.

Protein-coding genes which were only partially duplicated were further subdivided into true *partial* duplications and *chimeric* duplicates. True *partial* duplicates were those whose coding region was only partially duplicated, and not fused with another potential ORF (Fig. 4A). In contrast, *chimeric* duplicates were those where a partially duplicated open reading frame was fused to another ORF, which most likely arose due to the generation of two *partial* duplicates by the same duplication event, which are fused at the insertion site of the duplicate (Fig. 4A). *Chimerics* were inferred in two cases: from duplications giving rise to two *partial* duplicates (one per breakpoint) which remained in tandem order without interspersing sequence between the duplication products, and from *partial* duplicates generated by inverted duplications which remained adjacent but inverted order.

Intrachromosomal location was assigned based on five chromosomal regions as previously described (32) namely, left tip, left arm, core, right arm, and right tip. Expected

proportions of CNV breakpoints within each region was estimated based on the proportion of the genome falling within each category. An alternative expected number considering differences in recombination between these regions was also incorporated by normalizing the above length-normalized expected values by recombination rates of each of the five regions for each chromosome. For statistical analyses, the right and left tips and arms were combined into one tip and one arm category, yielding three chromosomal regions in total. Each breakpoint from a duplication or deletion event (two in each case) was mapped to one of those chromosomal regions in order to account for cases where a CNV spans the boundary between two chromosomal regions.

Differential transcription analyses were performed for *complete* gene duplicates only. Ancestral transcript abundance for affected genes was calculated by averaging the FPKM estimates from the three replicates sequenced via RNA-Seq for the ancestral line. These ancestral FPKM values were used to compare ancestral transcript abundance of duplicated genes between MA lines of different sizes. Furthermore, FPKM ratios were calculated between each gene duplicated within a given line and the average transcript abundance of the same gene in all lines bearing the gene in its ancestral state (neither duplicated nor deleted). FPKM ratios were only calculated if the average FPKM for the gene of interest in its ancestral state was equal to or above 1.

All statistical tests were performed in R (31).

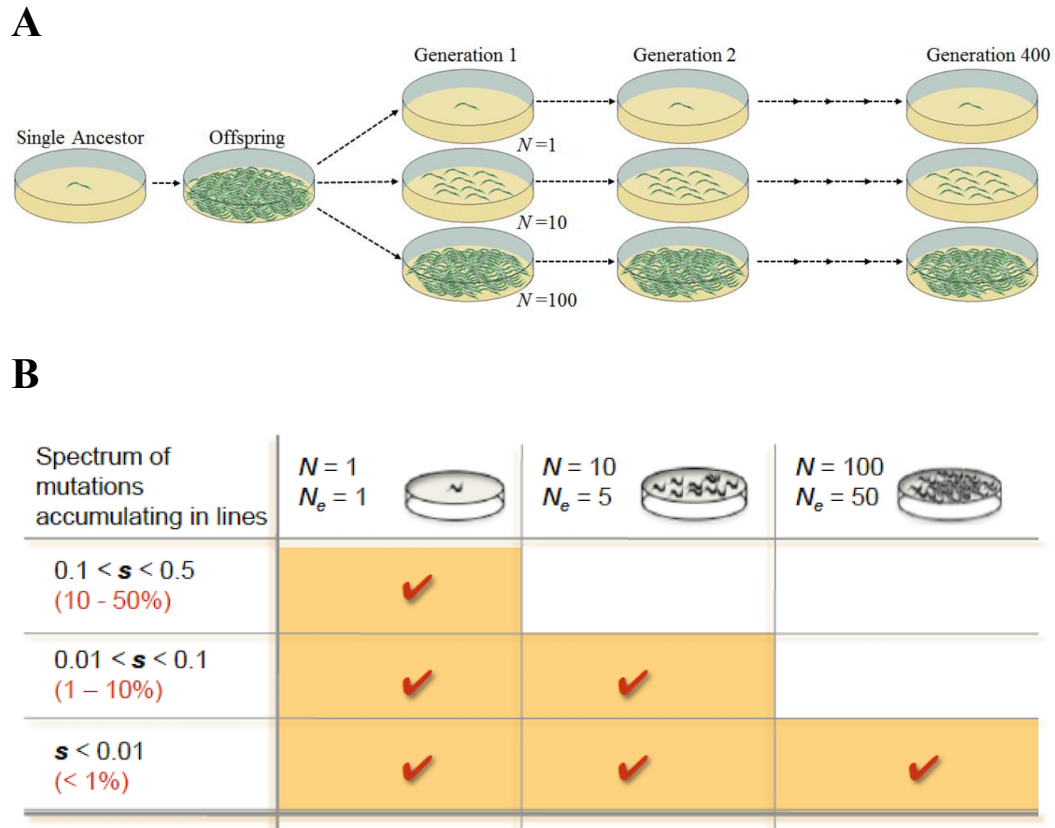

**Fig. S1. Schematic and theoretical underpinnings of the *C. elegans* spontaneous MA experiment with three population size treatments.** (A) All 35 lines are descended from a single *N2* hermaphrodite ancestor whose additional descendants were expanded for two generations and cryopreserved as ancestral, pre-MA controls. The maintenance of lines at varying  $N$  enables manipulation of the strength of selection. After  $t$  generations, the  $N=1$  lines are expected to have independently accumulated mutations, leading to a mean decline in fitness relative to the ancestral control and increased among-line variance. The larger population size treatments ( $N=10$  and 100 worms) will accumulate mutations whose fates will be determined by the fitness effects of the mutation and the strength of natural selection operating in these genetic backgrounds. (B) The maintenance of experimental lines at varying  $N$  (and effective population size,  $N_e$ ) permits the manipulation of the strength of selection across different treatments. This enables the subdivision of the spectrum of mutational effects into a wide range of successively narrower classes across the three  $N_e$  treatments. Lines maintained at  $N_e = 1$  are expected to accumulate mutations with selection coefficient,  $s$ ,  $< 0.5$  (very large effect to neutral).  $N_e = 5$  lines experience minimal levels of selection and are predicted to accumulate mutations with  $s < 0.1$  (moderately large effect to neutral).  $N_e = 50$  lines are subjected to the greatest intensity of selection and are predicted to accumulate mutations with  $s < 0.01$  (slight effect to neutral).

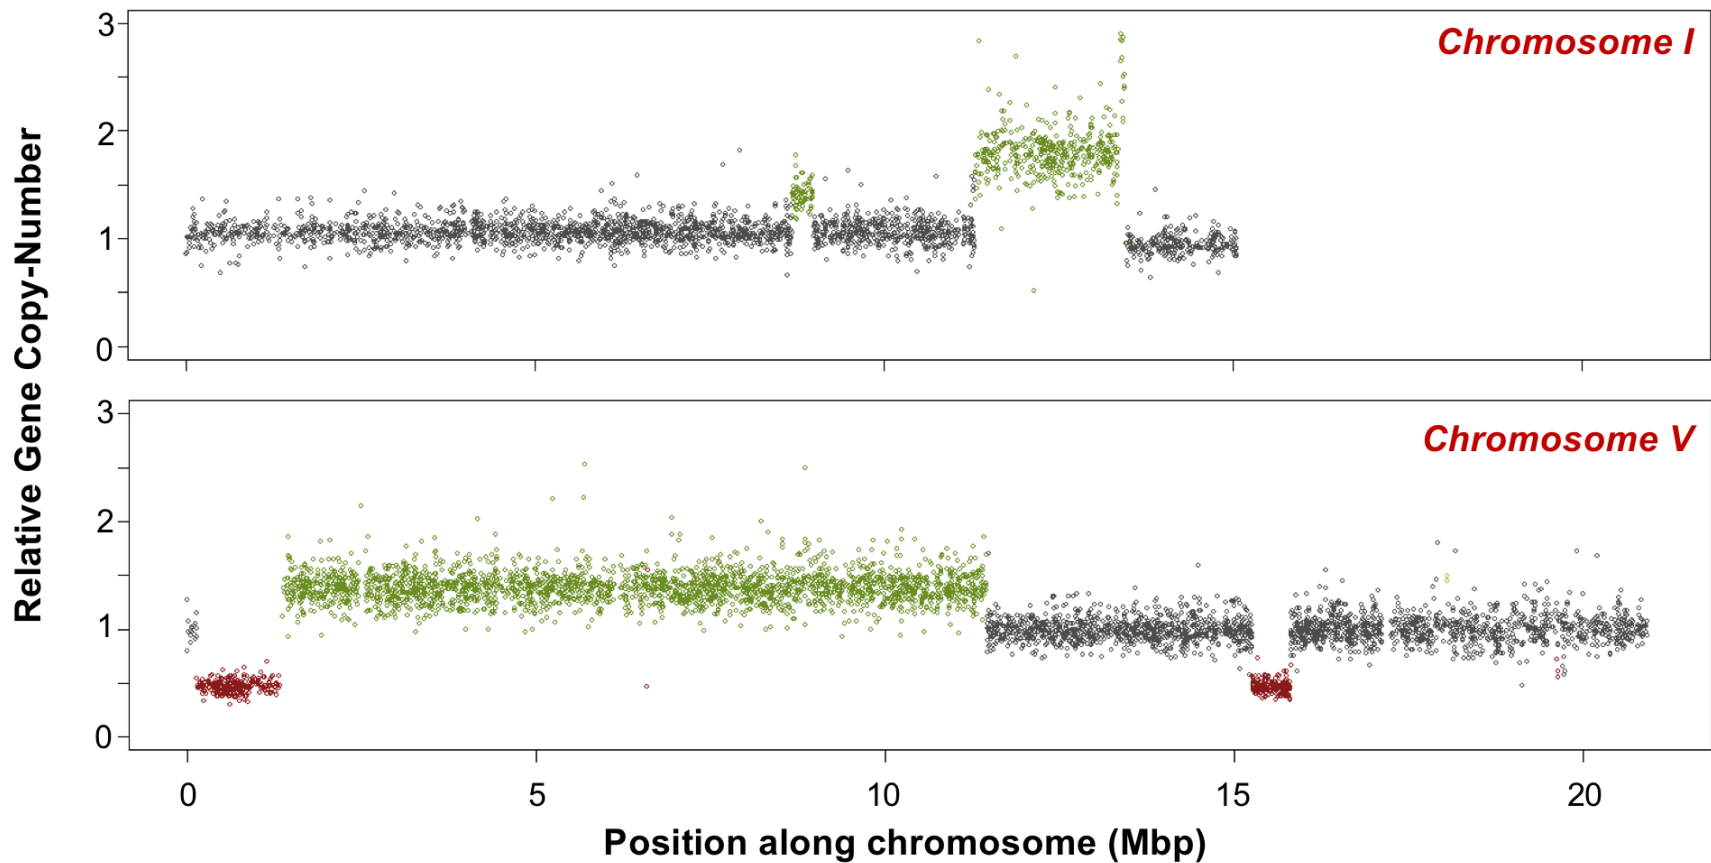

**Fig. S2. Relative copy-number ratio between genes of MA line 1T and the ancestor for chromosomes I (top) and V (bottom).** Duplicated and deleted genes are shown in green and red, respectively, and all other genes are in gray. Relative copy-number for each gene was calculated independently for 1T and the ancestor by normalizing gene coverage by the genome-wide coverage of the corresponding line. The ratio between the relative copy-number of 1T and the ancestor was calculated for each gene. Each ratio was further normalized by dividing it with the average gene copy-number ratio of unduplicated/undeleted genes. Large scale duplications and deletions detected by both arrays and other sequence-based methods are clearly visible.

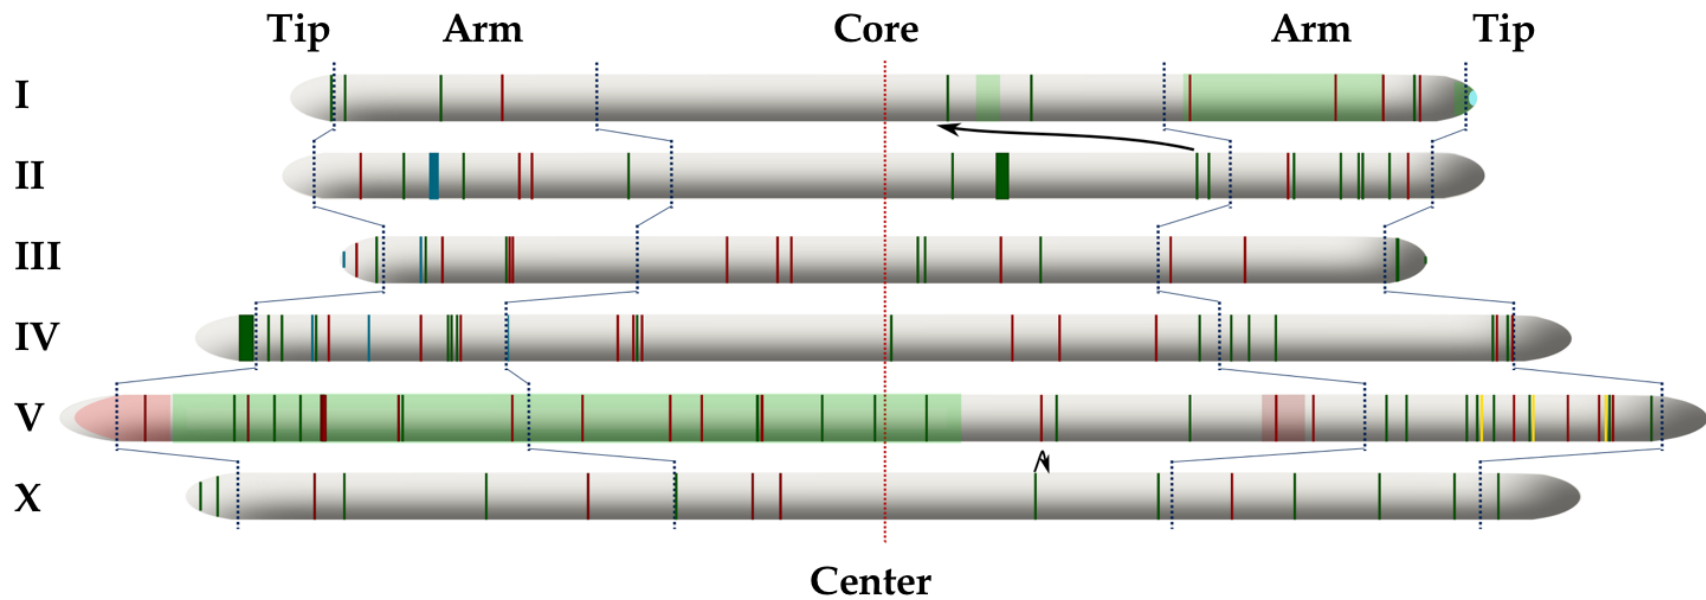

**Fig. S3.** The chromosomal and regional location of each duplication (green) and deletion (red) across all MA lines. Hypermutable regions and complex events are illustrated in yellow and teal, respectively. Copy-number gains of rDNA genes at one tip of chromosome I are displayed in light blue.

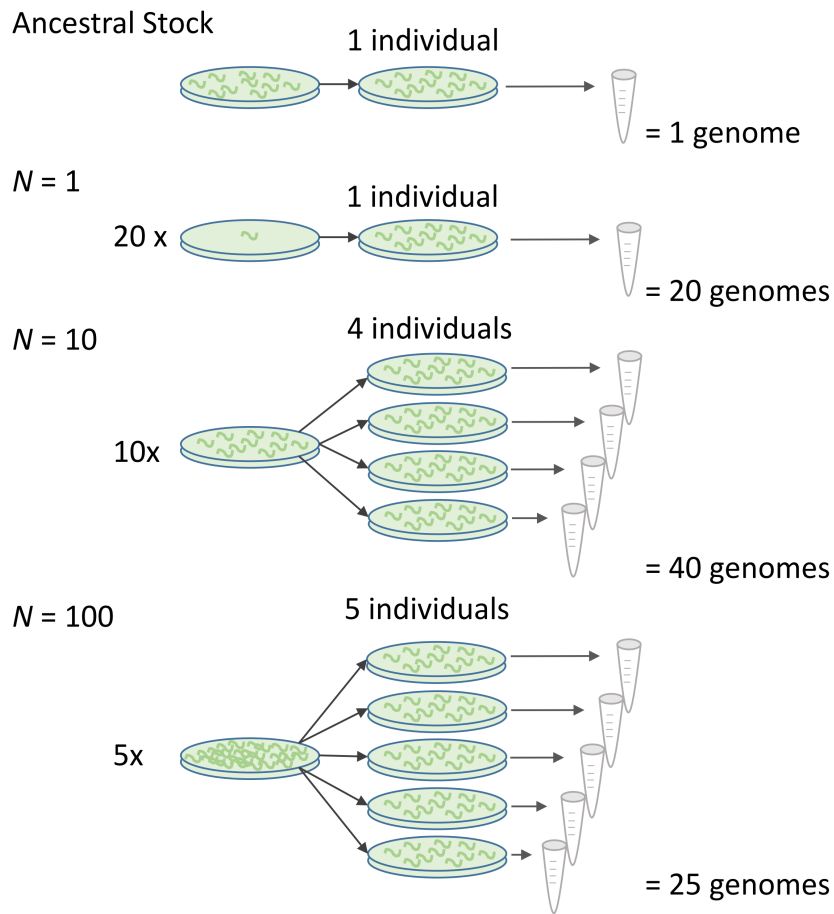

**Fig. S4.** Whole-genome sequencing to yield 86 *C. elegans* genomes, including that of the ancestral control and 35 MA lines following  $\sim 409$  MA generations. Multiple individuals were sequenced for MA lines maintained at larger population sizes ( $N = 10$  and  $100$ ).

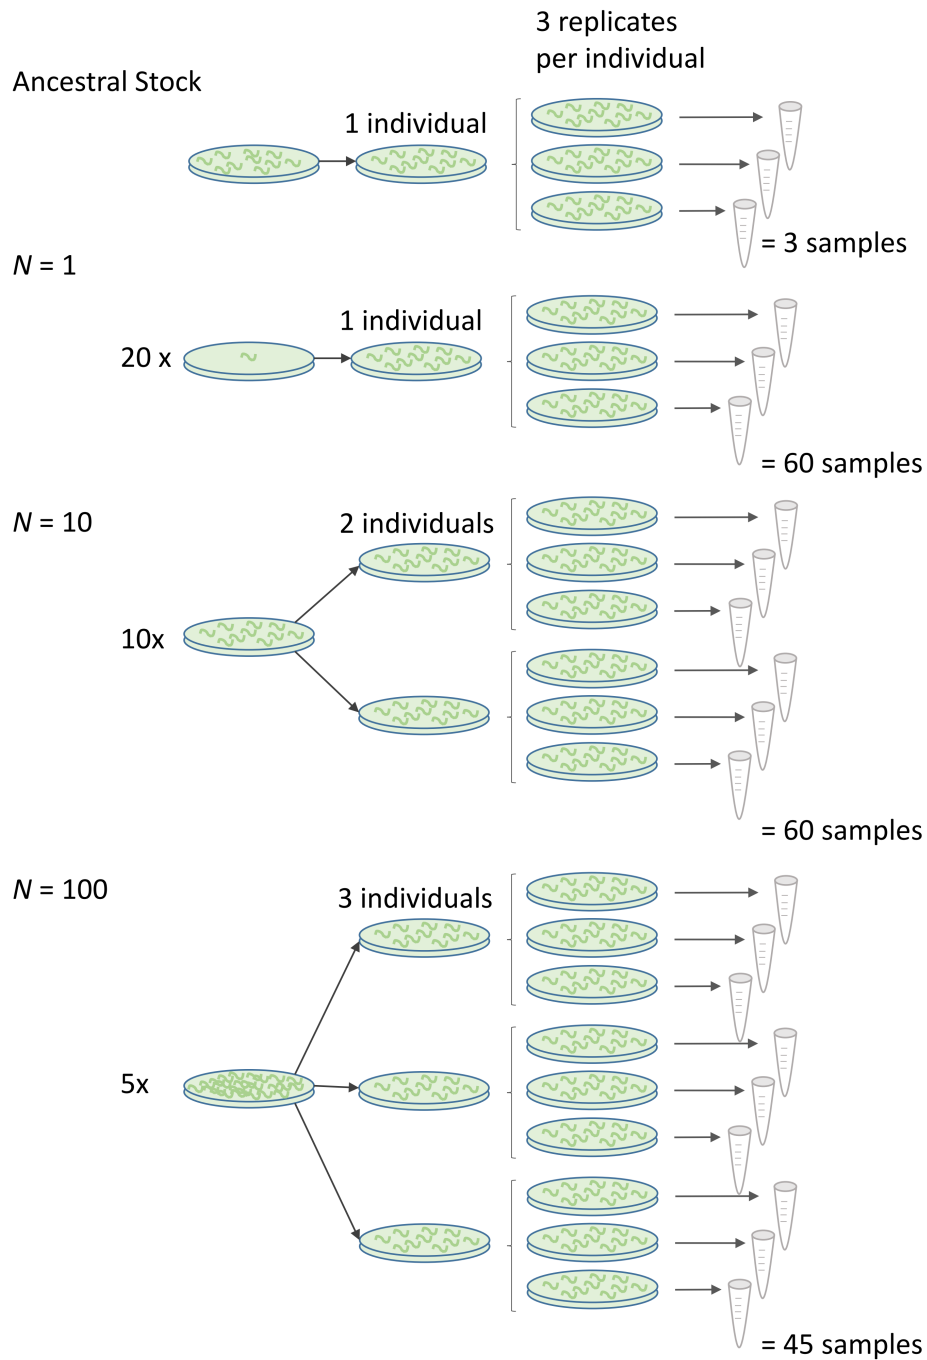

**Fig. S5.** Experimental design for RNA-Seq at the L1 larval stage. One individual was isolated from every population of size  $N = 1$ , while two and three individuals were isolated from populations of size  $N = 10$  and  $N = 100$ , respectively. Additionally, one individual from the ancestral pre-MA control was isolated for sequencing. For each of these 56 individuals, three pre-adult L4 offspring were isolated from the  $F_1$  generation to establish three biological replicates yielding a total of 168 lines for L1 tissue collection and RNA-Seq.



**Table S1. List of duplications and copy-number gains identified in the *C. elegans* MA lines.** Details for all duplications are summarized with the corresponding detection methods used. Start and end positions indicate the boundaries of the duplication. Type refers to the class of duplication; ‘DUP’ represents the duplication of a gene existing in single-copy form in the ancestral control, ‘CNV-Gain’ refers to additional copy-number increases of a gene already duplicated in the ancestral control, ‘INV’ refers to an inversion event. Span indicates the length of the duplication tract. Array Avg. Log<sub>2</sub>-Ratio values are indicated and also represent a confirmation of the duplication event via oaCGH. Check marks indicate that a given variant caller (column headers) verified the presence of the CNV (DELLY, CNVnator, RAPTR-SV, Pindel, CNV-seq). The SplitRD column indicates the presence of split reads.

| MA Line | Individual | Chromosome | Start      | End        | Type         | Span (bp) | Array Avg. Log <sub>2</sub> -Ratio | Array <i>p</i> -value | DELLY | CNVnator | RAPTR-SV | Pindel | CNV-seq | SplitRD |
|---------|------------|------------|------------|------------|--------------|-----------|------------------------------------|-----------------------|-------|----------|----------|--------|---------|---------|
| 1A      | 1          | IV         | 1,491,426  | 1,502,092  | DUP          | 10,667    | 0.77                               | 0.00E+00              | ✓     | ✓        | ✓        |        | ✓       | ✓       |
| 1B      | 1          | I          | 1,890,742  | 1,902,823  | DUP          | 12,082    | 0.91                               | 0.00E+00              | ✓     | ✓        |          |        | ✓       | ✓       |
| 1B      | 1          | III        | 13,775,397 | 13,783,592 | CNV-Gain     | 8,196     | 1.44                               | 0.00E+00              |       | ✓        | ✓        | ✓      | ✓       | ✓       |
| 1C      | 1          | II         | 2,241,381  | 2,252,027  | DUP          | 10,647    | 1.02                               | 0.00E+00              | ✓     | ✓        | ✓        |        | ✓       |         |
| 1C      | 1          | V          | 19,628,302 | 19,638,846 | CNV-Gain     | 10,545    | 0.74                               | 0.00E+00              |       | ✓        |          |        | ✓       | ✓       |
| 1C      | 1          | X          | 6,179,685  | 6,180,981  | DUP          | 1,297     | 0.89                               | 2.41E-08              | ✓     | ✓        | ✓        |        | ✓       |         |
| 1D      | 1          | II         | 14,062,836 | 14,075,924 | DUP          | 13,089    | 0.97                               | 0.00E+00              | ✓     | ✓        | ✓        |        | ✓       | ✓       |
| 1D      | 1          | V          | 16,834,786 | 16,840,667 | DUP          | 5,882     | 1.00                               | 0.00E+00              | ✓     | ✓        | ✓        |        | ✓       | ✓       |
| 1E      | 1          | V          | 19,628,301 | 19,638,841 | CNV-Gain     | 10,541    | 0.55                               | 0.00E+00              | ✓     | ✓        |          |        | ✓       |         |
| 1F      | 1          | V          | 17,858,099 | 17,870,256 | DUP-INV      | 12,158    | 0.75                               | 0.00E+00              | ✓     | ✓        | ✓        |        | ✓       | ✓       |
| 1F      | 1          | V          | 18,703,462 | 18,725,500 | CNV-Gain     | 22,039    | 0.43                               | 0.00E+00              | ✓     | ✓        | ✓        |        | ✓       | ✓       |
| 1G      | 1          | IV         | 3,170,028  | 3,175,871  | CNV-Gain/INV | 5,844     | 0.64                               | 6.66E-16              |       | ✓        |          |        | ✓       | ✓       |
| 1H      | 1          | II         | 11,604,654 | 11,612,116 | DUP          | 7,463     | 0.93                               | 0.00E+00              | ✓     | ✓        | ✓        |        | ✓       |         |
| 1H      | 1          | V          | 2,666,647  | 2,677,587  | DUP          | 10,941    | 0.83                               | 2.22E-16              | ✓     | ✓        | ✓        |        | ✓       |         |
| 1H      | 1          | V          | 2,995,626  | 2,999,375  | DUP          | 3,750     | 0.69                               | 3.11E-15              |       | ✓        |          |        | ✓       |         |
| 1H      | 1          | V          | 20,208,424 | 20,218,338 | DUP          | 9,915     | 0.93                               | 2.22E-16              | ✓     | ✓        | ✓        |        | ✓       | ✓       |
| 1J      | 1          | I          | 14,772,019 | 15,059,500 | DUP          | 287,482   | 0.96                               | 0.00E+00              |       | ✓        |          |        | ✓       | ✓       |
| 1J      | 1          | V          | 14,328,511 | 14,348,442 | DUP          | 19,932    | 0.93                               | 0.00E+00              |       | ✓        |          |        | ✓       | ✓       |
| 1J      | 1          | X          | 14,065,154 | 14,067,623 | DUP          | 2,470     | 0.85                               | 4.37E-09              | ✓     | ✓        | ✓        |        | ✓       |         |

|            |         |     |            |            |          |            |      |          |   |   |   |  |   |   |
|------------|---------|-----|------------|------------|----------|------------|------|----------|---|---|---|--|---|---|
| <b>1K</b>  | 1       | IV  | 13,132,618 | 13,138,209 | CNV-Gain | 5,593      | 0.53 | 2.22E-16 |   | √ |   |  |   |   |
| <b>1M</b>  | 1       | II  | 11,758,483 | 11,759,418 | CNV-Gain | 936        | 0.57 | 1.94E-07 | √ | √ |   |  |   |   |
| <b>1M</b>  | 1       | V   | 9,642,547  | 9,656,316  | DUP      | 13,770     | 0.92 | 0.00E+00 | √ | √ | √ |  | √ |   |
| <b>1M</b>  | 1       | V   | 18,047,556 | 18,055,941 | CNV-Gain | 16,500     | 0.80 | 2.22E-16 |   | √ |   |  |   | √ |
| <b>1M</b>  | 1       | V   | 19,628,302 | 19,638,846 | CNV-Gain | 10,545     | 0.69 | 0.00E+00 | √ | √ | √ |  |   |   |
| <b>1N</b>  | 1       | IV  | 13,699,635 | 13,708,460 | DUP      | 8,826      | ---  | ---      | √ | √ | √ |  | √ |   |
| <b>1N</b>  | 1       | V   | 2,153,728  | 2,171,422  | DUP      | 17,695     | ---  | ---      | √ | √ | √ |  | √ |   |
| <b>1O</b>  | 1       | V   | 18,703,462 | 18,725,500 | CNV-Gain | 22,039     | 0.75 | 0.00E+00 | √ | √ | √ |  | √ |   |
| <b>1P</b>  | 1       | II  | 1,477,555  | 1,494,758  | DUP      | 17,204     | 0.92 | 0.00E+00 | √ | √ | √ |  | √ |   |
| <b>1P</b>  | 1       | II  | 9,047,662  | 9,218,406  | DUP      | 170,745    | 0.93 | 0.00E+00 | √ | √ | √ |  | √ |   |
| <b>1Q</b>  | 1       | III | 416,789    | 424,370    | DUP      | 7,582      | 0.67 | 0.00E+00 |   |   |   |  | √ | √ |
| <b>1R</b>  | 1       | II  | 8,483,391  | 8,485,504  | DUP/INV  | 2,114      | 0.91 | 1.88E-08 | √ | √ | √ |  | √ |   |
| <b>1R</b>  | 1       | III | 2,072,788  | 2,074,728  | DUP      | 1,941      | 0.81 | 9.01E-08 |   | √ |   |  | √ |   |
| <b>1R</b>  | 1       | X   | 3,755,108  | 3,757,743  | CNV-Gain | 2,636      | 0.66 | 9.07E-12 | √ | √ |   |  | √ |   |
| <b>1S</b>  | 1       | IV  | 507,687    | 701,904    | DUP      | 194,218    | 1.00 | 0.00E+00 |   | √ |   |  | √ |   |
| <b>1S</b>  | 1       | X   | 16,101,121 | 16,111,314 | DUP      | 10,194     | 0.88 | 4.44E-16 | √ | √ | √ |  | √ |   |
| <b>1T</b>  | 1       | I   | 8,684,377  | 8,990,908  | DUP/INV  | 306,532    | 0.43 | 0.00E+00 | √ | √ | √ |  |   | √ |
| <b>1T</b>  | 1       | I   | 11,303,876 | 13,455,916 | DUP      | 2,152,041  | 0.74 | 0.00E+00 |   | √ |   |  | √ |   |
| <b>1T</b>  | 1       | II  | 13,442,444 | 13,455,009 | DUP      | 12,566     | 1.28 | 0.00E+00 | √ | √ | √ |  | √ |   |
| <b>1T</b>  | 1       | IV  | 16,465,126 | 16,470,875 | DUP      | 5,750      | 0.75 | 0.00E+00 |   | √ |   |  | √ |   |
| <b>1T</b>  | 1       | V   | 1,358,715  | 11,455,976 | DUP      | 10,097,262 | 0.30 | 0.00E+00 | √ |   |   |  | √ |   |
| <b>1T</b>  | 1       | V   | 18,047,556 | 18,055,941 | CNV-Gain | 9,006      | 0.56 | 0.00E+00 |   | √ |   |  |   |   |
| <b>10A</b> | 1,2,3,4 | I   | 9,371,845  | 9,383,731  | DUP      | 11,887     | 0.71 | 4.44E-16 | √ | √ | √ |  | √ | √ |
| <b>10A</b> | 1,2,3,4 | II  | 12,845,876 | 12,851,456 | DUP      | 5,581      | 0.70 | 2.86E-14 | √ | √ | √ |  | √ | √ |
| <b>10A</b> | 1,2,3,4 | IV  | 3,301,776  | 3,303,533  | CNV-Gain | 1,049      | 0.61 | 5.40E-11 |   | √ |   |  | √ |   |
| <b>10A</b> | 1,2,3,4 | V   | 10,314,272 | 10,322,679 | DUP      | 8,408      | 0.87 | 0.00E+00 | √ | √ | √ |  | √ | √ |
| <b>10A</b> | 1,2,3,4 | X   | 10,759,688 | 10,777,482 | DUP      | 17,795     | 0.88 | 0.00E+00 | √ | √ | √ |  | √ | √ |
| <b>10B</b> | 1,2,3,4 | II  | 4,346,667  | 4,375,131  | DUP      | 28,465     | 0.86 | 0.00E+00 | √ | √ | √ |  | √ | √ |
| <b>10B</b> | 1       | II  | 13,668,689 | 13,671,209 | DUP      | 2,885      | 0.82 | 5.62E-06 |   | √ |   |  |   | √ |
| <b>10B</b> | 1,2,3,4 | IV  | 16,652,907 | 16,674,262 | DUP      | 21,356     | 0.65 | 0.00E+00 | √ | √ | √ |  | √ | √ |
| <b>10B</b> | 1,2,3,4 | V   | 18,047,556 | 18,055,941 | CNV-Gain | 9,385      | 0.73 | 0.00E+00 |   | √ |   |  | √ |   |
| <b>10D</b> | 1,2,3,4 | III | 8,852,596  | 8,861,460  | DUP      | 8,865      | 0.94 | 0.00E+00 |   | √ |   |  | √ |   |

|             |           |     |            |            |          |        |      |          |   |   |   |   |   |   |
|-------------|-----------|-----|------------|------------|----------|--------|------|----------|---|---|---|---|---|---|
| <b>10E</b>  | 1         | III | 7,290,616  | 7,322,981  | DUP      | 32,366 | 0.81 | 0.00E+00 |   | √ | √ |   | √ | √ |
| <b>10F</b>  | 1,2,3,4   | I   | 671,745    | 674,753    | DUP      | 3,009  | 0.83 | 2.89E-11 | √ |   | √ |   | √ | √ |
| <b>10F</b>  | 1,2,3,4   | III | 7,384,627  | 7,405,305  | DUP      | 20,679 | 0.77 | 0.00E+00 | √ | √ | √ |   | √ | √ |
| <b>10F</b>  | 1,2,3,4   | V   | 10,975,075 | 10,981,752 | DUP      | 6,678  | 1.01 | 0.00E+00 | √ | √ | √ |   | √ | √ |
| <b>10F</b>  | 1,2,3,4   | V   | 19,699,111 | 19,701,469 | DUP/INV  | 2,359  | 1.32 | 2.50E-11 |   | √ |   |   |   | √ |
| <b>10F</b>  | 1,2,3,4   | X   | 16,662,716 | 16,691,668 | DUP/INV  | 28,953 | 1.07 | 4.44E-16 | √ | √ | √ |   | √ | √ |
| <b>10G</b>  | 1,2,3,4   | V   | 17,087,547 | 17,093,113 | DUP      | 5,567  | 0.73 | 1.62E-14 | √ | √ | √ |   | √ | √ |
| <b>10G</b>  | 1,2,3,4   | X   | 331,769    | 343,185    | DUP      | 11,417 | 0.67 | 0.00E+00 | √ | √ | √ |   | √ | √ |
| <b>10H</b>  | 1,2,3,4   | I   | 498,632    | 515,066    | DUP      | 16,435 | 0.79 | 0.00E+00 | √ | √ | √ |   | √ | √ |
| <b>10H</b>  | 1,2,3,4   | II  | 13,723,799 | 13,732,766 | DUP      | 8,968  | 0.90 | 0.00E+00 | √ | √ | √ |   | √ |   |
| <b>10H</b>  | 1,2,3,4   | IV  | 12,731,376 | 12,734,914 | DUP      | 3,539  | 0.65 | 4.16E-06 | √ | √ | √ |   | √ | √ |
| <b>10H</b>  | 1,2,3,4   | V   | 18,047,556 | 18,055,941 | CNV-Gain | 8,386  | 1.08 | 2.53E-05 |   |   |   |   | √ |   |
| <b>10H</b>  | 1,2,3,4   | V   | 18,703,462 | 18,725,500 | CNV-Gain | 22,039 | 1.22 | 0.00E+00 | √ | √ | √ |   | √ | √ |
| <b>10H</b>  | 1,2,3,4   | V   | 19,628,302 | 19,638,846 | CNV-Gain | 10,545 | 1.22 | 0.00E+00 | √ | √ |   |   | √ | √ |
| <b>10I</b>  | 1,2,3,4   | V   | 18,200,657 | 18,220,972 | DUP      | 20,316 | 0.52 | 0.00E+00 | √ | √ | √ |   | √ | √ |
| <b>10I</b>  | 1,2,3,4   | V   | 18,655,157 | 18,659,860 | DUP      | 4,704  | 0.56 | 4.44E-16 | √ | √ | √ |   | √ | √ |
| <b>10J</b>  | 1,2,3,4   | IV  | 5,573,447  | 5,577,327  | DUP      | 3,881  | 0.89 | 9.20E-09 | √ | √ | √ |   | √ | √ |
| <b>10J</b>  | 1,2,3,4   | V   | 8,813,209  | 8,854,407  | CNV-Gain | 38,250 | 0.51 | 0.00E+00 |   | √ |   |   | √ |   |
| <b>10J</b>  | 1,2,3,4   | V   | 18,703,462 | 18,725,500 | CNV-Gain | 22,039 | 0.51 | 2.22E-16 | √ | √ | √ |   | √ | √ |
| <b>100A</b> | 1,2,3,4,5 | IV  | 8,808,951  | 8,820,643  | DUP      | 11,693 | 0.56 | 6.66E-16 | √ | √ | √ |   | √ | √ |
| <b>100A</b> | 1,2,3,4,5 | X   | 15,148,341 | 15,156,990 | DUP      | 8,650  | 0.77 | 0.00E+00 | √ | √ | √ |   | √ | √ |
| <b>100B</b> | 1,2,3,4,5 | IV  | 13,361,611 | 13,370,521 | DUP      | 8,911  | 0.86 | 0.00E+00 | √ | √ | √ |   | √ | √ |
| <b>100B</b> | 1,2,3,4,5 | V   | 4,297,741  | 4,299,258  | DUP      | 1,518  | 0.83 | 2.34E-08 |   | √ |   |   | √ |   |
| <b>100B</b> | 1,2,3,4,5 | V   | 17,988,149 | 17,990,367 | DUP      | 2,219  | 0.94 | 4.19E-13 | √ | √ | √ |   | √ |   |
| <b>100C</b> | 4         | I   | 8,311,992  | 8,313,600  | DUP      | 1,609  | 0.76 | 1.60E-08 | √ | √ | √ |   | √ | √ |
| <b>100C</b> | 1,2,3,4,5 | III | 1,038,709  | 1,047,573  | DUP      | 8,865  | 0.89 | 0.00E+00 | √ | √ | √ |   | √ | √ |
| <b>100C</b> | 1,2,3,4,5 | IV  | 883,969    | 885,882    | DUP      | 1,914  | 0.93 | 4.04E-04 | √ | √ | √ | √ | √ | √ |
| <b>100D</b> | 1,2,3,4,5 | I   | 14,228,067 | 14,232,862 | DUP      | 4,796  | 0.90 | 0.00E+00 | √ | √ | √ |   | √ | √ |
| <b>100D</b> | 1,2,3,4,5 | X   | 113,370    | 124,038    | DUP      | 10,669 | 0.73 | 0.00E+00 | √ | √ | √ |   | √ | √ |
| <b>100D</b> | 1,2,3,4,5 | X   | 1,946,357  | 1,954,508  | CNV-Gain | 8,571  | 0.70 | 0.00E+00 |   | √ |   |   | √ |   |
| <b>100E</b> | 1,2,3,4,5 | IV  | 1,054,613  | 1,076,182  | DUP      | 21,570 | 0.84 | 4.44E-16 | √ | √ | √ |   | √ | √ |

|             |           |   |            |            |     |        |      |          |   |   |   |  |   |   |
|-------------|-----------|---|------------|------------|-----|--------|------|----------|---|---|---|--|---|---|
| <b>100E</b> | 1         | V | 12,630,113 | 12,651,002 | DUP | 20,890 | 0.78 | 0.00E+00 |   | √ |   |  | √ | √ |
| <b>100E</b> | 1,2,3,4,5 | X | 12,327,311 | 12,344,353 | DUP | 17,043 | 1.36 | 0.00E+00 | √ | √ | √ |  | √ | √ |

**Table S2. List of deletions and copy-number losses identified in the *C. elegans* MA lines. Details for all deletions are summarized with the corresponding detection methods used.** Start and end positions indicate the boundaries of the deletion. Type refers to the class of deletion; ‘DEL’ represents the deletion of a gene existing in single-copy form in the ancestral control, ‘CNV-Loss’ refers to copy-number decreases of a gene already duplicated in the ancestral control, ‘INV’ refers to an inversion event. Span indicates the length of the deletion tract. Array Avg. Log<sub>2</sub>-Ratio values are indicated and also represent a confirmation of the deletion event via oaCGH. Check marks indicate that a given variant caller (column headers) verified the presence of the CNV (DELLY, CNVnator, RAPTR-SV, Pindel, CNV-seq). The SplitRD column indicates the presence of split reads.

| MA Line | Individual | Chromosome | Start      | End        | Type     | Span (bp) | Array Avg. Log <sub>2</sub> -Ratio | Array p-value | DELLY | CNVnator | RAPTR-SV | Pindel | CNV-seq | SplitRD |
|---------|------------|------------|------------|------------|----------|-----------|------------------------------------|---------------|-------|----------|----------|--------|---------|---------|
| 1A      | 1          | III        | 10,504,419 | 10,504,983 | DEL      | 566       | -3.72                              | 9.04E-04      |       | √        |          | √      |         | √       |
| 1A      | 1          | V          | 2,328,000  | 2,343,592  | DEL      | 15,593    | -3.41                              | 2.22E-16      | √     | √        |          |        | √       | √       |
| 1A      | 1          | V          | 18,703,462 | 18,725,500 | CNV-Loss | 22,039    | -0.52                              | 0.00E+00      | √     | √        | √        |        | √       | √       |
| 1B      | 1          | V          | 18,703,462 | 18,725,500 | CNV-Loss | 22,039    | -0.65                              | 0.00E+00      |       |          |          |        | √       | √       |
| 1B      | 1          | V          | 19,142,663 | 19,143,016 | DEL      | 354       | -2.67                              | 4.68E-09      |       |          |          | √      |         | √       |
| 1B      | 1          | X          | 7,155,417  | 7,160,896  | DEL      | 5,480     | -4.99                              | 0.00E+00      | √     | √        | √        | √      | √       | √       |
| 1B      | 1          | X          | 7,510,116  | 7,523,788  | CNV-Loss | 13,674    | -0.96                              | 0.00E+00      |       |          |          |        | √       | √       |
| 1C      | 1          | I          | 11,386,307 | 11,395,050 | DEL/INV  | 8,744     | -4.48                              | 0.00E+00      |       | √        |          |        | √       | √       |
| 1D      | 1          | III        | 158,848    | 162,360    | CNV-Loss | 3,513     | -0.81                              | 2.66E-15      |       |          |          |        | √       |         |
| 1D      | 1          | V          | 12,436,894 | 12,439,536 | DEL      | 2,643     | -2.76                              | 2.39E-09      |       | √        |          |        | √       |         |
| 1E      | 1          | III        | 1,250,401  | 1,267,050  | CNV-Loss | 16,650    | -1.38                              | 0.00E+00      |       | √        |          |        | √       |         |
| 1E      | 1          | III        | 8,344,593  | 8,352,550  | CNV-Loss | 7,958     | -0.46                              | 0.00E+00      |       | √        |          |        | √       |         |
| 1E      | 1          | V          | 4,244,084  | 4,244,803  | DEL      | 720       | ---                                | ---           | √     | √        | √        | √      | √       |         |
| 1E      | 1          | V          | 18,703,462 | 18,725,500 | CNV-Loss | 22,039    | 0.43                               | 0.00E+00      | √     | √        | √        |        | √       |         |
| 1H      | 1          | II         | 925,851    | 996,807    | DEL      | 70,957    | -3.96                              | 0.00E+00      | √     | √        | √        |        | √       |         |
| 1J      | 1          | V          | 8,855,304  | 8,897,399  | CNV-Loss | 42,096    | -0.76                              | 0.00E+00      |       | √        |          |        | √       |         |
| 1J      | 1          | X          | 5,057,126  | 5,059,598  | DEL      | 2,473     | -2.65                              | 2.09E-11      |       | √        |          |        | √       | √       |
| 1K      | 1          | I          | 13,833,573 | 13,852,339 | DEL      | 18,767    | -3.83                              | 0.00E+00      |       | √        | √        | √      | √       | √       |
| 1K      | 1          | V          | 3,280,876  | 3,349,125  | DEL      | 68,250    | -2.56                              | 0.00E+00      |       | √        |          |        | √       |         |

|            |         |     |            |            |          |           |       |          |   |   |   |   |   |   |
|------------|---------|-----|------------|------------|----------|-----------|-------|----------|---|---|---|---|---|---|
| <b>1K</b>  | 1       | V   | 18,047,556 | 18,055,941 | CNV-Loss | 16,500    | -0.46 | 0.00E+00 |   | √ |   |   | √ |   |
| <b>1K</b>  | 1       | V   | 19,628,302 | 19,638,846 | CNV-Loss | 10,545    | -0.74 | 0.00E+00 | √ |   |   |   |   | √ |
| <b>1M</b>  | 1       | II  | 2,950,118  | 2,951,005  | DEL      | 888       | -2.27 | 4.69E-07 | √ | √ | √ |   | √ | √ |
| <b>1M</b>  | 1       | V   | 18,703,462 | 18,725,500 | CNV-Loss | 22,039    | -0.44 | 0.00E+00 |   | √ |   |   |   | √ |
| <b>1M</b>  | 1       | V   | 19,541,101 | 19,541,214 | DEL      | 114       | -1.73 | 1.91E-02 |   | √ |   | √ |   |   |
| <b>1N</b>  | 1       | I   | 13,231,770 | 13,232,375 | DEL      | 606       | ---   | ---      | √ | √ | √ | √ | √ |   |
| <b>1N</b>  | 1       | III | 5,683,068  | 5,687,599  | DEL      | 4,532     | ---   | ---      | √ | √ | √ | √ | √ |   |
| <b>1N</b>  | 1       | V   | 7,706,610  | 7,716,867  | DEL      | 10,258    | ---   | ---      | √ | √ | √ | √ | √ |   |
| <b>1Q</b>  | 1       | IV  | 10,350,537 | 10,351,598 | CNV-Loss | 1,062     | -0.70 | 4.27E-06 |   |   |   |   | √ |   |
| <b>1Q</b>  | 1       | IV  | 10,949,693 | 10,951,150 | CNV-Loss | 1,458     | -0.74 | 2.78E-09 |   |   |   |   | √ |   |
| <b>1R</b>  | 1       | I   | 2,665,172  | 2,666,157  | DEL      | 986       | -3.72 | 6.61E-06 | √ | √ | √ | √ |   | √ |
| <b>1R</b>  | 1       | IV  | 5,635,106  | 5,635,368  | DEL      | 263       | ---   | ---      | √ | √ | √ | √ |   |   |
| <b>1S</b>  | 1       | V   | 15,902,781 | 15,907,135 | CNV-Loss | 4,355     | -1.46 | 2.66E-15 |   | √ |   |   | √ |   |
| <b>1T</b>  | 1       | I   | 14,300,280 | 14,303,743 | CNV-Loss | 3,994     | -0.61 | 0.00E+00 |   | √ |   |   |   |   |
| <b>1T</b>  | 1       | IV  | 16,515,654 | 16,518,892 | CNV-Loss | 3,781     | -0.64 | 0.00E+00 |   | √ |   |   | √ |   |
| <b>1T</b>  | 1       | V   | 134,256    | 1,358,715  | CNV-Loss | 1,224,460 | -0.93 | 2.22E-16 |   | √ |   |   | √ |   |
| <b>1T</b>  | 1       | V   | 5,695,358  | 5,695,787  | CNV-Loss | 430       | -0.94 | 0.00E+00 |   |   | √ |   | √ |   |
| <b>1T</b>  | 1       | V   | 6,587,512  | 6,594,832  | CNV-Loss | 7,321     | -0.83 | 0.00E+00 |   |   | √ |   | √ |   |
| <b>1T</b>  | 1       | V   | 15,258,626 | 15,809,375 | CNV-Loss | 550,750   | -0.97 | 0.00E+00 |   | √ |   |   | √ |   |
| <b>1T</b>  | 1       | V   | 19,628,302 | 19,638,846 | CNV-Loss | 10,545    | -0.85 | 0.00E+00 |   |   |   |   | √ | √ |
| <b>10A</b> | 1,2,3,4 | III | 2,110,889  | 2,116,009  | CNV-Loss | 5,121     | -0.73 | 1.56E-05 |   | √ |   |   | √ |   |
| <b>10A</b> | 1,2,3,4 | IV  | 12,178,739 | 12,186,970 | CNV-Loss | 8,500     | -0.81 | 0.00E+00 |   | √ |   |   | √ |   |
| <b>10B</b> | 1,2,3,4 | IV  | 5,555,357  | 5,556,903  | CNV-Loss | 1,547     | -0.62 | 9.53E-12 |   | √ |   |   | √ |   |
| <b>10C</b> | 1,2,3,4 | IV  | 2,821,058  | 2,828,228  | CNV-Loss | 7,171     | -0.66 | 0.00E+00 |   |   |   |   | √ | √ |
| <b>10D</b> | 1,2,3,4 | II  | 14,304,215 | 14,308,448 | CNV-Loss | 4,234     | -0.79 | 0.00E+00 |   | √ |   |   | √ |   |
| <b>10D</b> | 1,2,3,4 | V   | 18,703,462 | 18,725,500 | CNV-Loss | 22,039    | -0.56 | 0.00E+00 |   |   |   |   | √ | √ |
| <b>10E</b> | 1,2,3,4 | III | 4,868,161  | 4,868,432  | DEL      | 272       | ---   | ---      | √ |   | √ | √ |   | √ |
| <b>10F</b> | 1,2,3,4 | II  | 12,770,142 | 12,770,446 | DEL      | 305       | -3.29 | 7.29E-05 | √ | √ | √ | √ |   | √ |
| <b>10F</b> | 1,2,3,4 | III | 11,448,761 | 11,449,280 | DEL      | 520       | ---   | ---      | √ | √ | √ | √ |   | √ |
| <b>10F</b> | 1,2,3,4 | IV  | 3,301,776  | 3,303,533  | CNV-Loss | 1,758     | -0.60 | 9.97E-07 |   | √ |   |   | √ |   |
| <b>10F</b> | 1,2,3,4 | V   | 18,703,462 | 18,725,500 | CNV-Loss | 22,039    | -1.26 | 0.00E+00 |   |   |   |   | √ | √ |

|             |           |     |            |            |          |        |       |          |   |   |   |   |   |   |
|-------------|-----------|-----|------------|------------|----------|--------|-------|----------|---|---|---|---|---|---|
| <b>10F</b>  | 1,2,3,4   | V   | 19,628,302 | 19,638,846 | CNV-Loss | 10,545 | -0.86 | 0.00E+00 | √ |   |   |   |   | √ |
| <b>10G</b>  | 1,2,3,4   | V   | 18,047,556 | 18,055,941 | CNV-Loss | 8,386  | -0.86 | 2.22E-16 |   |   |   |   |   | √ |
| <b>10I</b>  | 1,2,3,4   | V   | 1,016,652  | 1,016,777  | DEL      | 126    | ---   | ---      | √ |   |   |   | √ | √ |
| <b>10J</b>  | 1,2,3,4   | V   | 18,456,488 | 18,461,466 | DEL      | 4,979  | -2.10 | 5.89E-12 | √ | √ | √ | √ | √ | √ |
| <b>10J</b>  | 1,2,3,4   | X   | 1,568,326  | 1,572,549  | DEL      | 4,224  | -3.35 | 4.44E-16 | √ | √ | √ | √ | √ | √ |
| <b>100A</b> | 1,2,3,4,5 | II  | 3,111,346  | 3,111,550  | DEL      | 205    | -1.95 | 4.62E-04 | √ |   | √ | √ |   | √ |
| <b>100A</b> | 3         | IV  | 5,327,952  | 5,334,336  | DEL      | 6,385  | -0.98 | 1.92E-12 |   | √ |   | √ | √ | √ |
| <b>100A</b> | 1         | V   | 3,263,626  | 3,321,375  | DEL      | 57,750 | -1.53 | 0.00E+00 |   | √ |   |   | √ |   |
| <b>100A</b> | 1,2,3,4,5 | V   | 8,110,102  | 8,110,204  | DEL      | 103    | ---   | ---      | √ |   | √ | √ |   | √ |
| <b>100A</b> | 1,2,3,4,5 | V   | 19,628,302 | 19,638,846 | CNV-Loss | 10,545 | -0.81 | 0.00E+00 |   | √ |   |   | √ | √ |
| <b>100B</b> | 1,2,3,4,5 | III | 2,110,889  | 2,116,009  | CNV-Loss | 5,121  | -1.00 | 0.00E+00 |   |   |   |   | √ | √ |
| <b>100B</b> | 1,2,3,4,5 | IV  | 1,647,932  | 1,648,348  | DEL      | 417    | ---   | ---      | √ | √ | √ | √ |   | √ |
| <b>100B</b> | 1,2,3,4,5 | V   | 19,711,626 | 19,712,625 | CNV-Loss | 1,000  | -0.98 | 1.49E-10 |   | √ |   |   | √ |   |
| <b>100C</b> | 1,2,3,4,5 | V   | 15,426,625 | 15,435,582 | CNV-Loss | 8,958  | -0.46 | 0.00E+00 | √ | √ | √ |   | √ | √ |
| <b>100C</b> | 1,2,3,4,5 | X   | 13,264,348 | 13,265,264 | DEL      | 917    | -2.47 | 1.03E-03 | √ | √ | √ | √ | √ | √ |
| <b>100D</b> | 1,2,3,4,5 | V   | 18,703,462 | 18,725,500 | CNV-Loss | 22,039 | -0.58 | 0.00E+00 |   | √ | √ |   | √ | √ |
| <b>100E</b> | 1,2,3,4,5 | III | 5,507,055  | 5,509,326  | CNV-Loss | 2,272  | -0.87 | 3.55E-08 |   |   |   |   | √ |   |
| <b>100E</b> | 1,2,3,4,5 | IV  | 16,712,189 | 16,713,716 | CNV-Loss | 1,528  | -0.78 | 7.94E-12 |   |   |   |   | √ |   |

**Table S3. List of complex CNVs identified in the *C. elegans* MA lines.** Details for all complex CNVs are summarized with the corresponding detection methods used, and their various individual (sub-) CNVs which together constitute the event. Start and end positions indicate the boundaries of the sub-events comprising the larger complex event. Type refers to the class of sub-event; ‘DUP’ represents the duplication of a gene existing in single-copy form in the ancestral control, ‘CNV-Gain’ refers to additional copy-number increases of a gene already duplicated in the ancestral control, ‘DEL’ represents the deletion of a gene existing in single-copy form in the ancestral control, ‘CNV-Loss’ refers to copy-number decreases of a gene already duplicated in the ancestral control, ‘INV’ refers to an inversion event. Total span (bp) indicates the length of the entire complex event; sub-span refers to the length of the individual sub-CNV. Array Avg. Log<sub>2</sub>-Ratio values are indicated and also represent a confirmation of the duplication/deletion event via oaCGH. Check marks indicate that a given variant caller (column headers) verified the presence of the complex CNV (DELLY, CNVnator, RAPTR-SV, Pindel, CNV-seq, SVELTER). The SplitRD column indicates the presence of split reads for each of the sub-CNVs.

| MA Line | Individual | Chromosome | Start      | End        | Sub-Type | Total Span (bp) | Sub-Span (bp) | Array Avg. Log <sub>2</sub> -Ratio | Array <i>p</i> -value | DELLY | CNVnator | RAPTR-SV | Pindel | CNV-seq | SplitRD | SVELTER |
|---------|------------|------------|------------|------------|----------|-----------------|---------------|------------------------------------|-----------------------|-------|----------|----------|--------|---------|---------|---------|
| 1B      | 1          | II         | 1,812,432  | 1,817,620  | DEL      | 123,283         | 5,189         | -3.49                              | 1.37E-11              |       | √        |          |        | √       | √       |         |
|         |            |            | 1,913,641  | 1,927,858  | DUP/INV  |                 | 18,103        | 0.89                               | 0.00E+00              | √     | √        |          |        | √       | √       |         |
|         |            |            | 1,931,830  | 1,935,714  | DUP      |                 |               |                                    |                       | √     |          |          |        | √       | √       |         |
|         |            |            | 1,931,830  | 1,935,714  | CNV-Gain |                 | 3,885         | 1.21                               | 2.22E-16              |       | √        |          |        | √       | √       |         |
| 1B      | 1          | III        | 13,378,306 | 13,395,314 | DUP      | 17,009          | 17,009        | 1.45                               | 0.00E+00              |       | √        |          |        | √       | √       |         |
|         |            |            | 13,379,116 | 13,395,314 | CNV-Gain |                 | 16,199        |                                    |                       |       | √        |          |        | √       | √       |         |
| 1J      | 1          | IV         | 3,942,336  | 3,946,150  | CNV-Gain | 15,558          | 4,096         | ---                                | ---                   | √     | √        | √        |        | √       | √       | DEL-DUP |
|         |            |            | 3,953,798  | 3,957,893  | CNV-Gain |                 |               | 0.83                               | 4.66E-15              | √     | √        | √        |        | √       | √       |         |
|         |            |            | 3,946,151  | 3,949,588  | CNV-Loss |                 |               | -3.25                              | 0.00E+00              |       | √        |          |        | √       | √       |         |
| 1O      | 1          | III        | 979,540    | 979,778    | DUP      | 1,888           | 239           | ---                                | ---                   | √     |          | √        |        |         | √       |         |
|         |            |            | 977,891    | 978,943    | DEL      |                 | 1,208         | -2.69                              | 1.72E-06              |       | √        |          |        | √       | √       |         |
|         |            |            | 979,124    | 979,278    | DEL      |                 |               |                                    | ---                   | ---   |          | √        |        |         | √       | √       |
| 1Q      | 1          | IV         | 1,465,372  | 1,466,929  | DUP/INV  | 21,288          | 1,558         | 0.59                               | 2.08E-05              | √     |          |          |        |         |         |         |
|         |            |            | 1,445,642  | 1,465,097  | DEL      |                 | 19,456        | -3.39                              | 0.00E+00              |       | √        |          |        | √       | √       |         |
| 100B    | 1          | III        | 131        | 495        | DEL      | 14,800          | 680           | -1.76                              | 5.57E-03              |       | √        | √        | √      |         | √       |         |



|             |           |    |           |           |          |       |        |      |          |   |   |   |   |   |   |
|-------------|-----------|----|-----------|-----------|----------|-------|--------|------|----------|---|---|---|---|---|---|
|             |           |    | 599       | 913       | DEL      |       |        |      |          | √ | √ | √ |   | √ |   |
|             |           |    | 1,429     | 14,930    | DUP      |       | 14,931 | 0.96 | 0.00E+00 | √ |   |   | √ | √ |   |
| <b>100D</b> | 1,2,3,4,5 | IV | 2,162,953 | 2,165,969 | DUP      | 3,017 | 2,841  | ---  | ---      | √ | √ | √ |   | √ | √ |
|             |           |    | 2,164,750 | 2,164,925 | CNV-Loss |       | 176    | ---  | ---      | √ |   | √ | √ |   |   |

**Table S4. List of 161 copy-number changes detected in 33 spontaneous MA lines of *C. elegans* maintained at three differing population sizes.** Duplication and deletion events are further subdivided into (i) unique, previously unduplicated sequence, and (ii) copy-number gains or losses in ancestral multi-copy sequence (CNV). Copy-number changes are provided as raw counts as well as normalized counts (multiplying each event by the fraction of individuals of the population within which the variant was found). The normalized event counts are used to calculate the per genome mutation rates. Counts of protein-coding and other genes per population size were normalized in a similar fashion. Mutation rates per protein-coding gene were calculated using the normalized gene counts. Lengths of mutations were limited to the net length of copy-number increase or decrease at the end of the MA experiment. Hence, in the case of a complex rearrangement, the true length of a duplication may be underestimated, leading to a conservative estimate for the per gene duplication and deletion rates.

|                                                                                     |                  | Count of mutational events, normalized by<br>variant frequency (raw counts) |               |                |
|-------------------------------------------------------------------------------------|------------------|-----------------------------------------------------------------------------|---------------|----------------|
|                                                                                     |                  | <i>N</i> = 1                                                                | <i>N</i> = 10 | <i>N</i> = 100 |
| <b>Simple</b>                                                                       | Total Events     | 81                                                                          | 44.5 (46)     | 23.8 (27)      |
| <b>Duplications</b>                                                                 | Total            | 41                                                                          | 28.5 (31)     | 12.4 (14)      |
|                                                                                     | Unique           | 29                                                                          | 20.5 (22)     | 11.4 (13)      |
|                                                                                     | CNV              | 12                                                                          | 8.0 (9)       | 1.0 (1)        |
| <b>Deletions</b>                                                                    | Total            | 40                                                                          | 15.0 (15)     | 11.4 (13)      |
|                                                                                     | Unique           | 19                                                                          | 6.0 (6)       | 4.4 (6)        |
|                                                                                     | CNV              | 21                                                                          | 9.0 (9)       | 7.0 (7)        |
| <b>Complex</b>                                                                      | Total Events     | 5                                                                           | –             | 1.2 (2)        |
| <b>Duplications</b>                                                                 | Total            | 7                                                                           | –             | 1.2 (2)        |
|                                                                                     | Unique           | 4                                                                           | –             | 1.2 (2)        |
|                                                                                     | CNV              | 3                                                                           | –             | –              |
| <b>Deletions</b>                                                                    | Total            | 4                                                                           | –             | 1.2 (2)        |
|                                                                                     | Unique           | 3                                                                           | –             | 0.2 (1)        |
|                                                                                     | CNV              | 1                                                                           | –             | 1.0 (1)        |
| <b>Event/Genome/Generation (<math>\mu \times 10^{-3}</math>)</b>                    |                  |                                                                             |               |                |
| <b>Duplications</b>                                                                 | All duplications | 6.50                                                                        | 6.97          | 6.06           |
|                                                                                     | Unique           | 4.72                                                                        | 5.02          | 5.57           |
|                                                                                     | CNV              | 1.78                                                                        | 1.96          | 0.49           |
| <b>Deletions</b>                                                                    | All deletions    | 6.12                                                                        | 3.67          | 5.57           |
|                                                                                     | Unique           | 2.71                                                                        | 1.47          | 2.15           |
|                                                                                     | CNV              | 3.40                                                                        | 2.20          | 3.42           |
| <b>Complex</b>                                                                      | Complex Events   | 0.71                                                                        | –             | 0.98           |
| <b>All CNV</b>                                                                      | All CNV          | 13.32                                                                       | 10.64         | 12.62          |
| <b>Protein-coding genes affected by mutational events (normalized by frequency)</b> |                  |                                                                             |               |                |
| <b>Unique genes duplicated</b>                                                      | Total            | 3,277.00                                                                    | 58.25         | 32.00          |
|                                                                                     | Complete         | 3,236.00                                                                    | 34.00         | 20.40          |
|                                                                                     | Partial          | 41.00                                                                       | 24.25         | 11.60          |
| <b>Duplication of preexisting CNV genes</b>                                         | Total            | 39.0                                                                        | 29.0          | 2.0            |
|                                                                                     | Complete         | 18.0                                                                        | 12.0          | 2.0            |
| <b>Unique genes deleted</b>                                                         | Partial          | 21.0                                                                        | 7.0           | –              |
|                                                                                     | Total            | 92.0                                                                        | 6.0           | 8.4            |
|                                                                                     | Complete         | 66.0                                                                        | 2.0           | 4.6            |

|                                                                                                                                        |                     | Count of mutational events, normalized by<br>variant frequency (raw counts) |               |                |
|----------------------------------------------------------------------------------------------------------------------------------------|---------------------|-----------------------------------------------------------------------------|---------------|----------------|
|                                                                                                                                        |                     | <i>N</i> = 1                                                                | <i>N</i> = 10 | <i>N</i> = 100 |
| <b>Deletion of preexisting<br/>CNV genes</b>                                                                                           | Partial             | 26.0                                                                        | 4.0           | 3.8            |
|                                                                                                                                        | Total               | 496.0                                                                       | 21.0          | 15.0           |
|                                                                                                                                        | Complete            | 475.0                                                                       | 11.0          | 6.0            |
|                                                                                                                                        | Partial             | 21.0                                                                        | 10.0          | 9.0            |
| <b><i>Span of Mutational Events</i></b>                                                                                                |                     |                                                                             |               |                |
| <b>All duplications</b>                                                                                                                | Median              | 10,647                                                                      | 9,385         | 8,756          |
|                                                                                                                                        | Minimum             | 936                                                                         | 1,049         | 1,518          |
|                                                                                                                                        | Maximum             | 10,097,262                                                                  | 38,250        | 21,570         |
| <b>Unique duplications</b>                                                                                                             | Median              | 11,512                                                                      | 8,917         | 8,856          |
|                                                                                                                                        | Minimum             | 1,297                                                                       | 2,359         | 1,518          |
|                                                                                                                                        | Maximum             | 10,097,262                                                                  | 32,366        | 21,570         |
| <b>Copy-Number Gains</b>                                                                                                               | Median              | 10,541                                                                      | 10,545        | 8,571          |
|                                                                                                                                        | Minimum             | 936                                                                         | 1,049         | 8,571          |
|                                                                                                                                        | Maximum             | 22,039                                                                      | 38,250        | 8,571          |
| <b>All deletions</b>                                                                                                                   | Median              | 7,321                                                                       | 4,607         | 2,272          |
|                                                                                                                                        | Minimum             | 114                                                                         | 126           | 103            |
|                                                                                                                                        | Maximum             | 1,224,260                                                                   | 22,039        | 57,750         |
| <b>Unique deletions</b>                                                                                                                | Median              | 2,558                                                                       | 413           | 667            |
|                                                                                                                                        | Minimum             | 114                                                                         | 126           | 103            |
|                                                                                                                                        | Maximum             | 70,957                                                                      | 4,979         | 57,750         |
| <b>Copy-Number Losses</b>                                                                                                              | Median              | 10,545                                                                      | 7,779         | 5,121          |
|                                                                                                                                        | Minimum             | 430                                                                         | 1,547         | 1,000          |
|                                                                                                                                        | Maximum             | 1,224,460                                                                   | 22,039        | 22,039         |
| <b><i>Mutation Rate (<math>\mu \times 10^{-5}</math>) (/ protein-coding gene/generation; based on 20,724 protein-coding genes)</i></b> |                     |                                                                             |               |                |
| <b><i><math>\mu_{\text{duplication}}</math></i></b>                                                                                    | Total               | 2.883                                                                       | 0.103         | 0.080          |
|                                                                                                                                        | Unique duplications | 2.856                                                                       | 0.069         | 0.076          |
|                                                                                                                                        | Copy-number gains   | 0.027                                                                       | 0.034         | 0.005          |
| <b><i><math>\mu_{\text{deletion}}</math></i></b>                                                                                       | Total               | 0.500                                                                       | 0.032         | 0.055          |
|                                                                                                                                        | Unique deletions    | 0.073                                                                       | 0.007         | 0.020          |
|                                                                                                                                        | Copy-number losses  | 0.427                                                                       | 0.025         | 0.035          |

**Table S5. Distribution of copy-number changes across chromosomes.** Chromosome V harbours a disproportionately greater number of copy-number changes relative to other chromosomes. This is primarily due to copy-number gains and losses in pre-existing duplications. The expected number of copy-number changes for the *G*-tests is the product of the relative size of each chromosome and the number of independent copy-number changes of any given type.

|                            | <i>Chromosome</i> |            |            |            |            |            | <i>G</i> | <i>df</i> | <i>p-value</i>         |
|----------------------------|-------------------|------------|------------|------------|------------|------------|----------|-----------|------------------------|
|                            | <b>I</b>          | <b>II</b>  | <b>III</b> | <b>IV</b>  | <b>V</b>   | <b>X</b>   |          |           |                        |
| <b>Expected</b>            | <b>15%</b>        | <b>15%</b> | <b>14%</b> | <b>17%</b> | <b>21%</b> | <b>18%</b> |          |           |                        |
| <b>Observed</b>            |                   |            |            |            |            |            |          |           |                        |
| <i>All events</i>          | 14 (8.8%)         | 17 (10.6%) | 20 (12.5%) | 30 (18.8%) | 64 (40.0%) | 15 (9.0%)  | 37.4     | 5         | $5.01 \times 10^{-7}$  |
| <i>All CNV</i>             | 1 (1.6%)          | 2 (3.3%)   | 7 (11.5%)  | 13 (21.3%) | 35 (57.4%) | 3 (4.9%)   | 55.2     | 5         | $1.17 \times 10^{-10}$ |
| <i>All unique</i>          | 12 (13.0%)        | 15 (16.3%) | 10 (10.9%) | 14 (15.2%) | 29 (31.5%) | 12 (13.0%) | 6.7      | 5         | 0.24                   |
| <i>All duplications</i>    | 9 (10.5%)         | 12 (14.0%) | 7 (8.1%)   | 16 (18.6%) | 32 (37.2%) | 10 (11.6%) | 14.7     | 5         | 0.01                   |
| <i>All deletions</i>       | 5 (8.1%)          | 5 (8.1%)   | 10 (16.1%) | 5 (8.1%)   | 32 (51.6%) | 5 (8.1%)   | 33.0     | 5         | $3.76 \times 10^{-6}$  |
| <i>CNV-Gain</i>            | 0 (0.0%)          | 1 (4.3%)   | 1 (4.3%)   | 5 (21.7%)  | 14 (60.9%) | 2 (8.7%)   | 4.5      | 5         | $1.72 \times 10^{-4}$  |
| <i>CNV-Loss</i>            | 1 (2.6%)          | 1 (2.6%)   | 6 (15.8%)  | 8 (21.1%)  | 21 (55.3%) | 1 (2.6%)   | 34.8     | 5         | $1.67 \times 10^{-6}$  |
| <i>Unique duplications</i> | 9 (14.3%)         | 11 (17.5%) | 6 (9.5%)   | 11 (17.5%) | 18 (28.6%) | 8 (12.7%)  | 3.7      | 5         | 0.59                   |
| <i>Unique deletions</i>    | 3 (10.3%)         | 4 (13.8%)  | 4 (13.8%)  | 3 (10.3%)  | 11 (37.9%) | 4 (13.8%)  | 5.0      | 5         | 0.41                   |
| <i>Complex</i>             | 1 (14.3%)         | 0 (0.0%)   | 3 (42.9%)  | 3 (42.9%)  | 0 (0.0%)   | 0 (0.0%)   | 12.1     | 5         | 0.30                   |

**Table S6. Intrachromosomal distribution of copy number break-points.** Chromosomal regions identified as tips, cores and arms are based on Rockman and Kruglyak (26). The number of breakpoints deviates significantly from random expectations based on the cumulative size of different regions, and the combined size and recombination frequency.

|                                             | Chromosomal Region |            |             | Expectation by Length |           |                        | Expectation by Length and Recombination |           |                         |
|---------------------------------------------|--------------------|------------|-------------|-----------------------|-----------|------------------------|-----------------------------------------|-----------|-------------------------|
|                                             | <i>Tip</i>         | <i>Arm</i> | <i>Core</i> | <i>G</i>              | <i>df</i> | <i>p-value</i>         | <i>G</i>                                | <i>df</i> | <i>p-value</i>          |
| <b>MA Population Size Treatment</b>         |                    |            |             |                       |           |                        |                                         |           |                         |
| <i>N</i> = 1                                | 14                 | 119        | 49          | 28.42                 | 2         | $6.74 \times 10^{-7}$  | $\infty$                                | 2         | $< 2.2 \times 10^{-16}$ |
| <i>N</i> = 10                               | 6                  | 60         | 22          | 17.42                 | 2         | $1.65 \times 10^{-4}$  | $\infty$                                | 2         | $< 2.2 \times 10^{-16}$ |
| <i>N</i> = 100                              | 8                  | 32         | 18          | 6.49                  | 2         | $3.89 \times 10^{-2}$  | $\infty$                                | 2         | $< 2.2 \times 10^{-16}$ |
| <b>All MA Lines</b>                         | 28                 | 211        | 89          | 48.79                 | 2         | $2.55 \times 10^{-11}$ | $\infty$                                | 2         | $< 2.2 \times 10^{-16}$ |
| <b>Expected by Length</b>                   | 0.07               | 0.47       | 0.46        |                       |           |                        |                                         |           |                         |
| <b>Expected by Length and Recombination</b> | 0.00               | 0.20       | 0.80        |                       |           |                        |                                         |           |                         |

**Table S7. Summary of population size ( $N$ ), generations of propagation, sequence coverage per genome, and average sequence coverage across individuals per line.**

| Line                     | $N$ | MA Generations | Average Line Coverage | Individual Sequenced | Coverage |
|--------------------------|-----|----------------|-----------------------|----------------------|----------|
| Pre-MA Ancestral Control | N/A | N/A            | 30                    | 1                    | 30       |
| MA 1A                    | 1   | 389            | 35                    | 1                    | 36       |
| MA 1B                    | 1   | 397            | 32                    | 1                    | 32       |
| MA 1C                    | 1   | 392            | 35                    | 1                    | 35       |
| MA 1D                    | 1   | 326            | 33                    | 1                    | 33       |
| MA 1E                    | 1   | 368            | 27                    | 1                    | 27       |
| MA 1F                    | 1   | 386            | 29                    | 1                    | 29       |
| MA 1G                    | 1   | 346            | 27                    | 1                    | 27       |
| MA 1H                    | 1   | 281            | 34                    | 1                    | 34       |
| MA 1J                    | 1   | 396            | 42                    | 1                    | 42       |
| MA 1K                    | 1   | 349            | 21                    | 1                    | 21       |
| MA 1M                    | 1   | 395            | 29                    | 1                    | 29       |
| MA 1N                    | 1   | 363            | 29                    | 1                    | 29       |
| MA 1O                    | 1   | 397            | 17                    | 1                    | 17       |
| MA 1P                    | 1   | 393            | 27                    | 1                    | 27       |
| MA 1Q                    | 1   | 381            | 30                    | 1                    | 30       |
| MA 1R                    | 1   | 386            | 35                    | 1                    | 35       |
| MA 1S                    | 1   | 291            | 23                    | 1                    | 23       |
| MA 1T                    | 1   | 305            | 18                    | 1                    | 18       |
| MA 10A                   | 10  | 409            | 19                    | 1                    | 23       |
|                          |     |                |                       | 2                    | 21       |
|                          |     |                |                       | 3                    | 17       |
|                          |     |                |                       | 4                    | 17       |
| MA 10B                   | 10  | 409            | 13                    | 1                    | 15       |
|                          |     |                |                       | 2                    | 11       |
|                          |     |                |                       | 3                    | 16       |
|                          |     |                |                       | 4                    | 10       |
| MA 10C                   | 10  | 408            | 9                     | 1                    | 8        |
|                          |     |                |                       | 2                    | 12       |
|                          |     |                |                       | 3                    | 8        |
|                          |     |                |                       | 4                    | 8        |
| MA 10D                   | 10  | 408            | 13                    | 1                    | 8        |
|                          |     |                |                       | 2                    | 16       |
|                          |     |                |                       | 3                    | 14       |
|                          |     |                |                       | 4                    | 16       |
| MA 10E                   | 10  | 409            | 16                    | 1                    | 16       |
|                          |     |                |                       | 2                    | 18       |
|                          |     |                |                       | 3                    | 13       |
|                          |     |                |                       | 4                    | 16       |

|         |     |     |    |   |    |
|---------|-----|-----|----|---|----|
| MA 10F  | 10  | 409 | 13 | 1 | 10 |
|         |     |     |    | 2 | 12 |
|         |     |     |    | 3 | 15 |
|         |     |     |    | 4 | 14 |
| MA 10G  | 10  | 409 | 17 | 1 | 18 |
|         |     |     |    | 2 | 18 |
|         |     |     |    | 3 | 16 |
|         |     |     |    | 4 | 16 |
| MA 10H  | 10  | 408 | 18 | 1 | 17 |
|         |     |     |    | 2 | 18 |
|         |     |     |    | 3 | 17 |
|         |     |     |    | 4 | 18 |
| MA 10I  | 10  | 409 | 19 | 1 | 15 |
|         |     |     |    | 2 | 19 |
|         |     |     |    | 3 | 10 |
|         |     |     |    | 4 | 32 |
| MA 10J  | 10  | 408 | 18 | 1 | 16 |
|         |     |     |    | 2 | 20 |
|         |     |     |    | 3 | 16 |
|         |     |     |    | 4 | 21 |
| MA 100A | 100 | 409 | 17 | 1 | 15 |
|         |     |     |    | 2 | 19 |
|         |     |     |    | 3 | 16 |
|         |     |     |    | 4 | 17 |
|         |     |     |    | 5 | 18 |
| MA 100B | 100 | 409 | 17 | 1 | 19 |
|         |     |     |    | 2 | 17 |
|         |     |     |    | 3 | 16 |
|         |     |     |    | 4 | 18 |
|         |     |     |    | 5 | 15 |
| MA 100C | 100 | 409 | 17 | 1 | 16 |
|         |     |     |    | 2 | 16 |
|         |     |     |    | 3 | 15 |
|         |     |     |    | 4 | 17 |
|         |     |     |    | 5 | 19 |
| MA 100D | 100 | 409 | 17 | 1 | 16 |
|         |     |     |    | 2 | 18 |
|         |     |     |    | 3 | 16 |
|         |     |     |    | 4 | 16 |
|         |     |     |    | 5 | 17 |
| MA 100E | 100 | 409 | 17 | 1 | 17 |
|         |     |     |    | 2 | 18 |
|         |     |     |    | 3 | 16 |
|         |     |     |    | 4 | 16 |
|         |     |     |    | 5 | 18 |

## SI References

1. Vassilieva LL, Hook AM, Lynch M (2000) The fitness effects of spontaneous mutations in *Caenorhabditis elegans*. *Evolution* 54:1234–1246.
2. Baer CF, et al. (2005) Comparative evolutionary genetics of spontaneous mutations affecting fitness in rhabditid nematodes. *Proc Natl Acad Sci USA* 102:5785–5790.
3. Katju V, LaBeau EM, Lipinski KJ, Bergthorsson U (2008) Sex change by gene conversion in a *Caenorhabditis elegans fog-2* mutant. *Genetics* 180:669–672.
4. Lewis JA, Fleming JT. 1995. Basic culture methods. *Methods Cell Biol* 48:3–29.
5. Kimura, M (1962) On the probability of fixation of mutant genes in a population. *Genetics* 47:713-719.
6. Kimura M (1983) *The Neutral Theory of Molecular Evolution* (Cambridge University Press, Cambridge).
7. Crow J, Kimura M (1970). *An Introduction to Population Genetics Theory*. (Harper & Row, New York).
8. Pollak E (1987) On the theory of partially inbreeding finite population. I. Partial selfing. *Genetics* 117:353–360.
9. Ohta T (1972) Fixation probability of a mutant influenced by random fluctuation of selection intensity. *Genet. Res.* 19:33–38.
10. Ohta T (1992) The nearly neutral theory of molecular evolution. *Annu. Rev. Ecol. Syst.* 23:263–286.
11. Flibotte S, et al. (2010) Whole-genome profiling of mutagenesis in *Caenorhabditis elegans*. *Genetics* 185:431–441.
12. Thompson O, et al. (2013) The million mutation project: a new approach to genetics in *Caenorhabditis elegans*. *Genome Res* 23:1749–1762.



13. Konrad A, et al. (2017) Mitochondrial mutation rate, spectrum and heteroplasmy in *Caenorhabditis elegans* spontaneous mutation accumulation lines of differing population size. *Mol Biol Evol* 34:1319–1334.
14. Maydan JS, Lorch A, Edgley ML, Flibotte S, Moerman DG (2010) Copy number variation in the genomes of twelve natural isolates of *Caenorhabditis elegans*. *BMC Genomics* 11:62.
15. Maydan JS, et al. (2007) Efficient high-resolution deletion discovery in *Caenorhabditis elegans* by array comparative genomic hybridization. *Genome Res* 17:337–347.
16. Farslow JC, et al. (2015) Rapid increase in frequency of gene copy-number variants during experimental evolution in *Caenorhabditis elegans*. *BMC Genomics* 16:1044.
17. Harris TW, et al. (2010) WormBase: a comprehensive resource for nematode research. *Nucleic Acids Res* 38 (Database issue):D463–D467.
18. Li H, Durbin R (2009) Fast and accurate short read alignment with Burrows-Wheeler transform. *Bioinformatics* 25:1754–1760.
19. Li H, et al. (2009) The Sequence alignment/map (SAM) format and SAMtools. *Bioinformatics* 25:2078–2079.
20. Rausch T, et al. (2012) DELLY: structural variant discovery by integrated paired-end and split-read analysis. *Bioinformatics* 28:i333–i339.
21. Ye K, Schulz MH, Long Q, Apweiler R, Ning Z (2009) Pindel: a pattern growth approach to detect break points of large deletions and medium sized insertions from paired-end short reads. *Bioinformatics* 25:2865–2871.
22. Bickhart DM, et al. (2015) RAPTR-SV: a hybrid method for the detection of structural variants. *Bioinformatics* 31:2084–2090.

23. Abyzov A, Urban AE, Snyder M, Gerstein M (2011) CNVnator: an approach to discover, genotype, and characterize typical and atypical CNVs from family and population genome sequencing. *Genome Res* 21:974–984.
24. Xie C, Tammi MT (2009) CNV-seq, a new method to detect copy number variation using high-throughput sequencing. *BMC Bioinformatics* 10:80.
25. Thorvaldsdóttir H, Robinson JT, Mesirov JP (2011) Integrative Genomics Viewer (IGV): high-performance genomics data visualization and exploration. *Briefings in Bioinformatics* 14:178–192.
26. Edgar RC (2004) MUSCLE: multiple sequence alignment with high accuracy and high throughput. *Nucleic Acids Res* 32:1792–1797.
27. Zhao X, Emery SB, Myers B, Kidd JM, Mills RE (2016) Resolving complex structural genomic rearrangements using a randomized approach. *Genome Biol* 17:126.
28. Trapnell C, Pachter L, Salzberg SL (2009) TopHat: discovering splice junctions with RNA-Seq. *Bioinformatics* 25:1105–1111.
29. Trapnell C, et al. (2012) Differential gene and transcript expression analysis of RNA-seq experiments with TopHat and Cufflinks. *Nat Protocols* 7:562–578.
30. Trapnell C, et al. (2010) Transcript assembly and quantification by RNA-Seq reveals unannotated transcripts and isoform switching during cell differentiation. *Nat. Biotechnol* 28:511–515.
31. R Core Development Team (2014) R: A language and environment for statistical computing. R Foundation for Statistical Computing, Vienna, Austria. URL <http://www.R-project.org/>.
32. Rockman MV, Kruglyak L. (2009) Recombinational landscape and population genomics of *Caenorhabditis elegans*. *PLoS Genet* 5:e1000419.
